# Supplementary material for: Genomic Analysis of Rwandan G9P[8] Rotavirus Strains Pre- and Post-RotaTeq® Vaccine Reveals Significant Distinct Sub-Clustering in a Post-Vaccination Cohort
Source: MDPI journal article supplement (doi:10.3390/v15122321), 2023-11-25
Supplement: s1 [file s1]

## Supplementary Material S2: Maximum likelihood trees generated in this G9P[8] study

NSP1

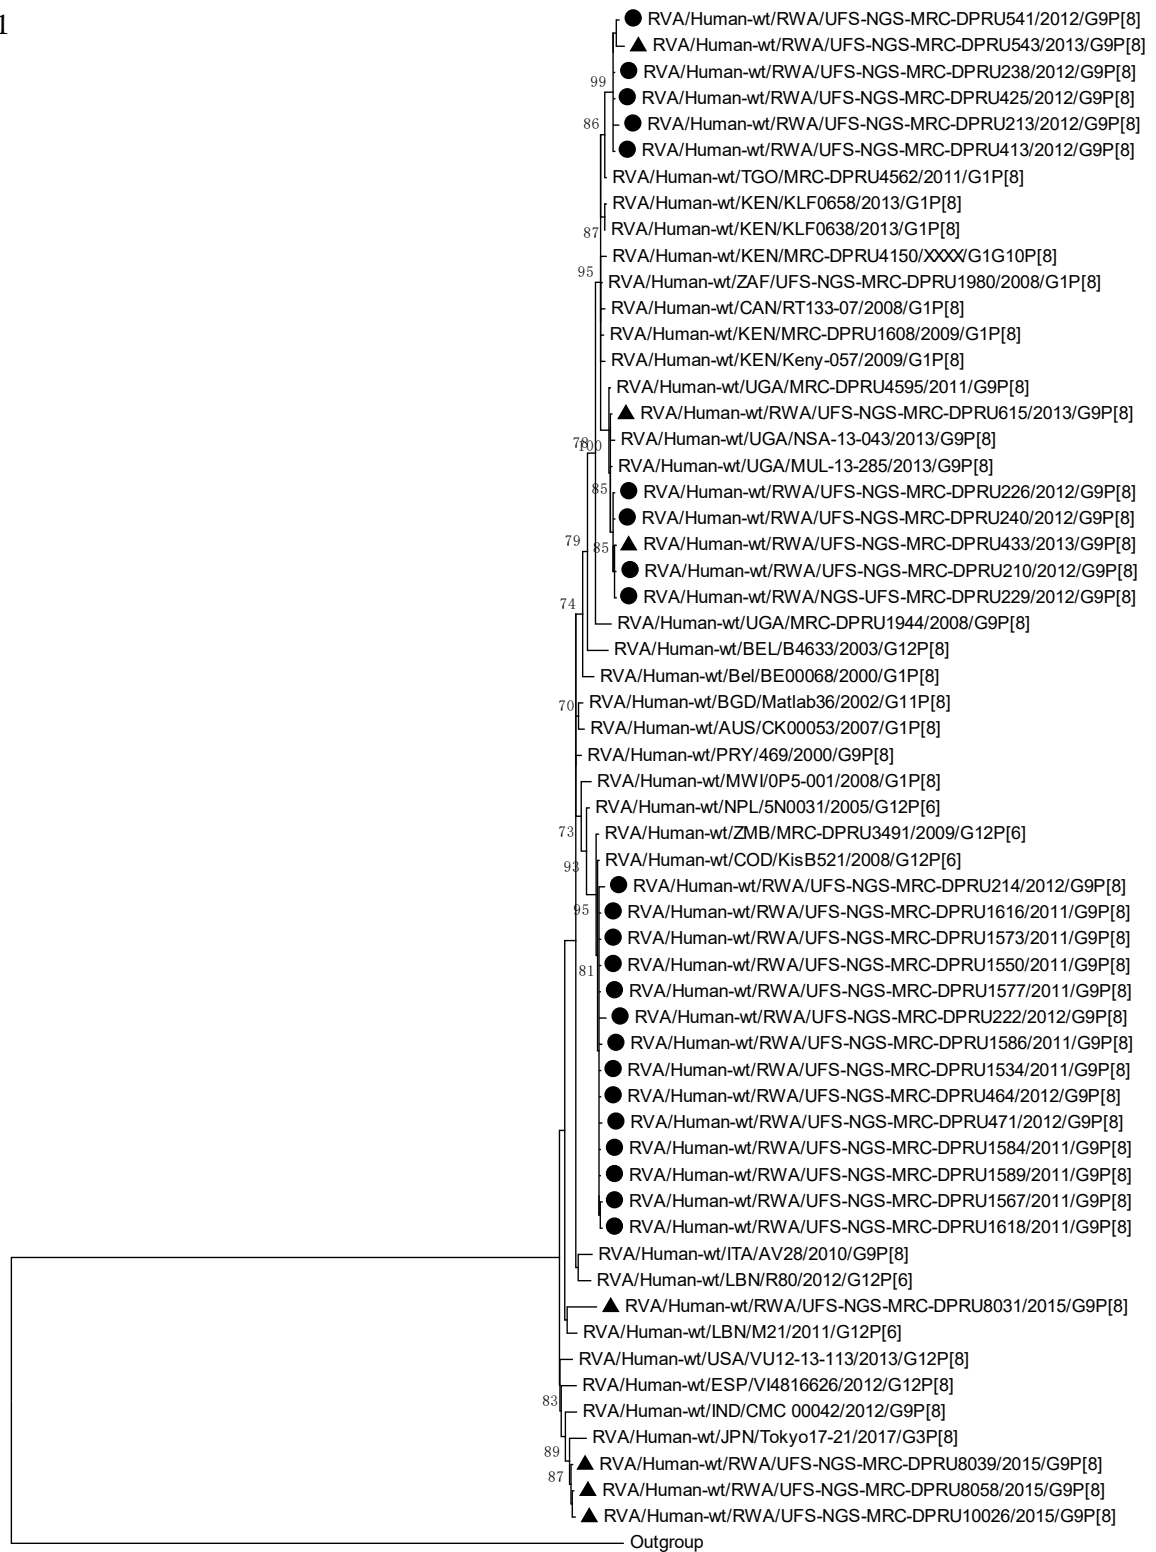

0,001

NSP2

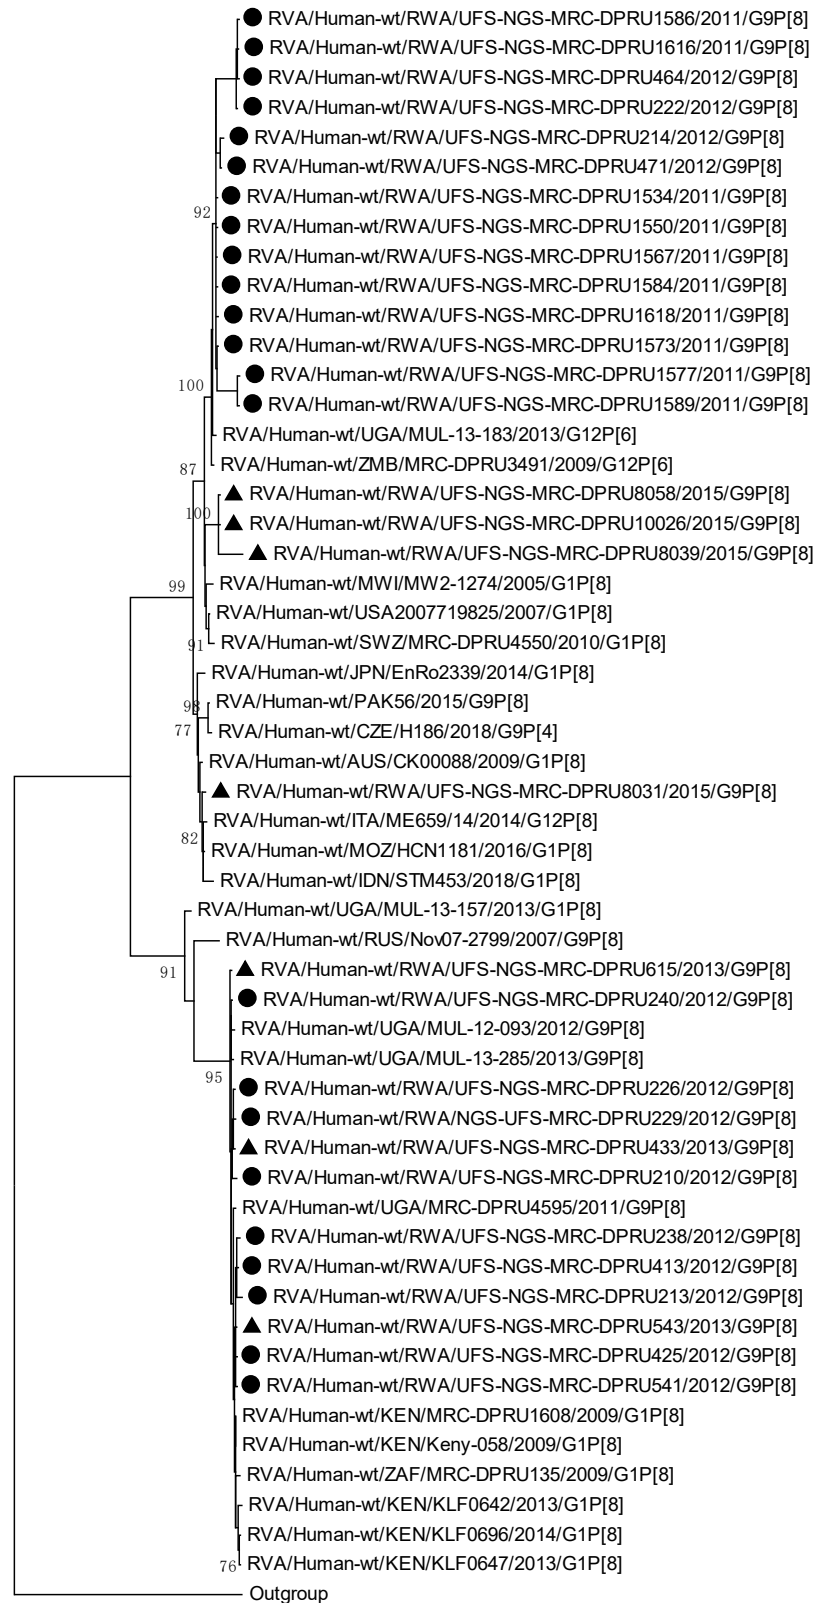

0,001

# NSP3

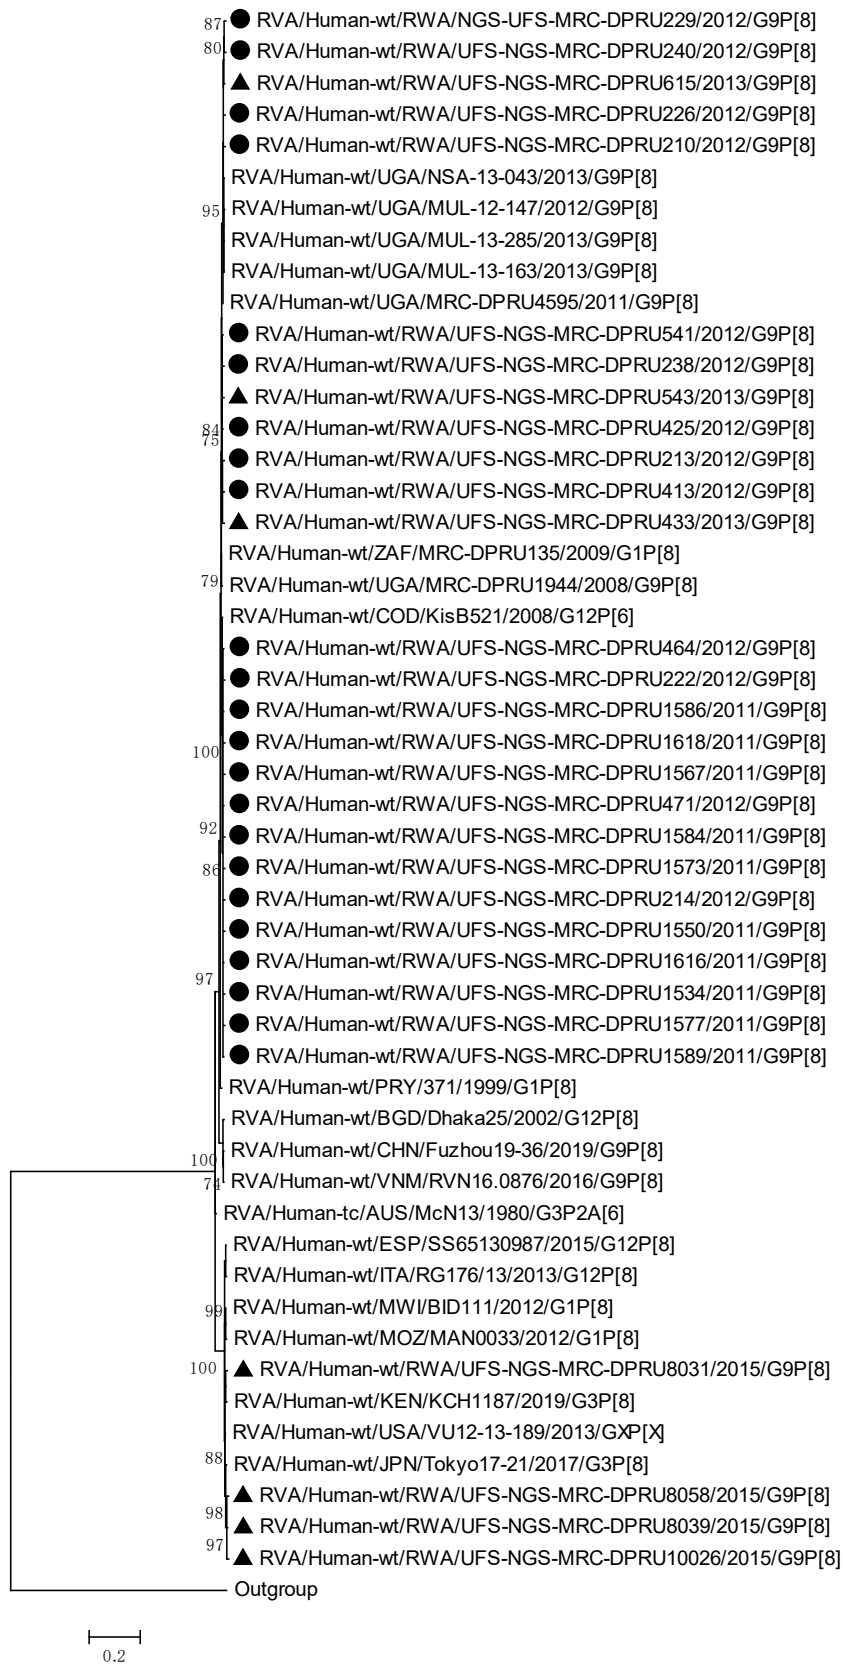

# NSP4

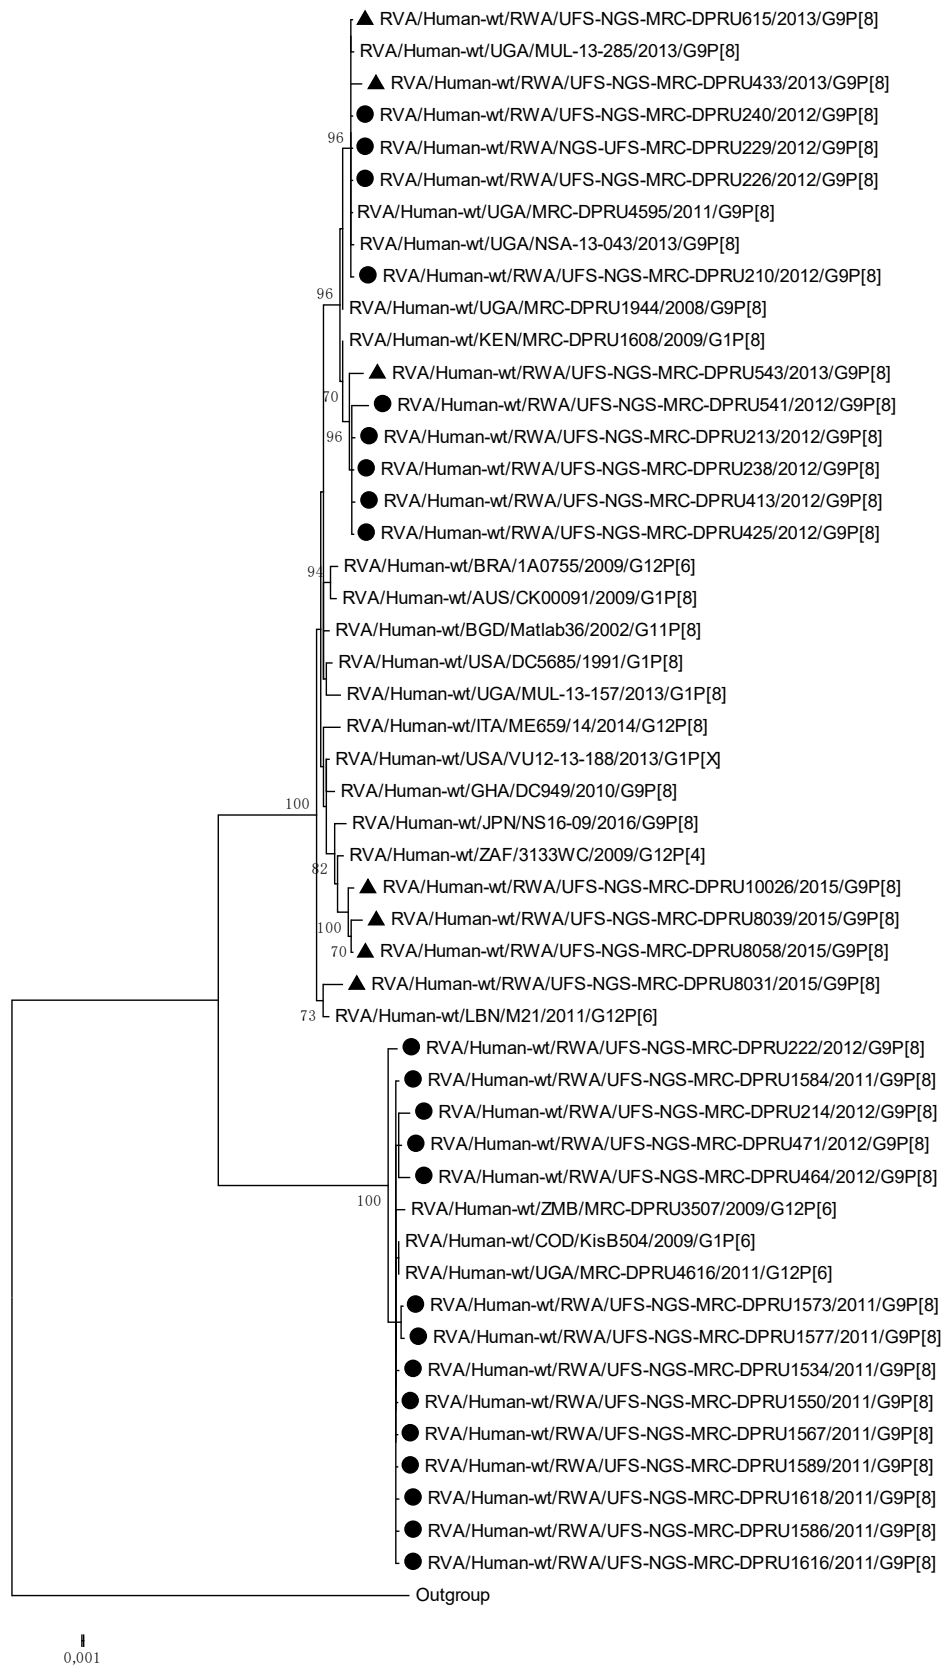

NSP5

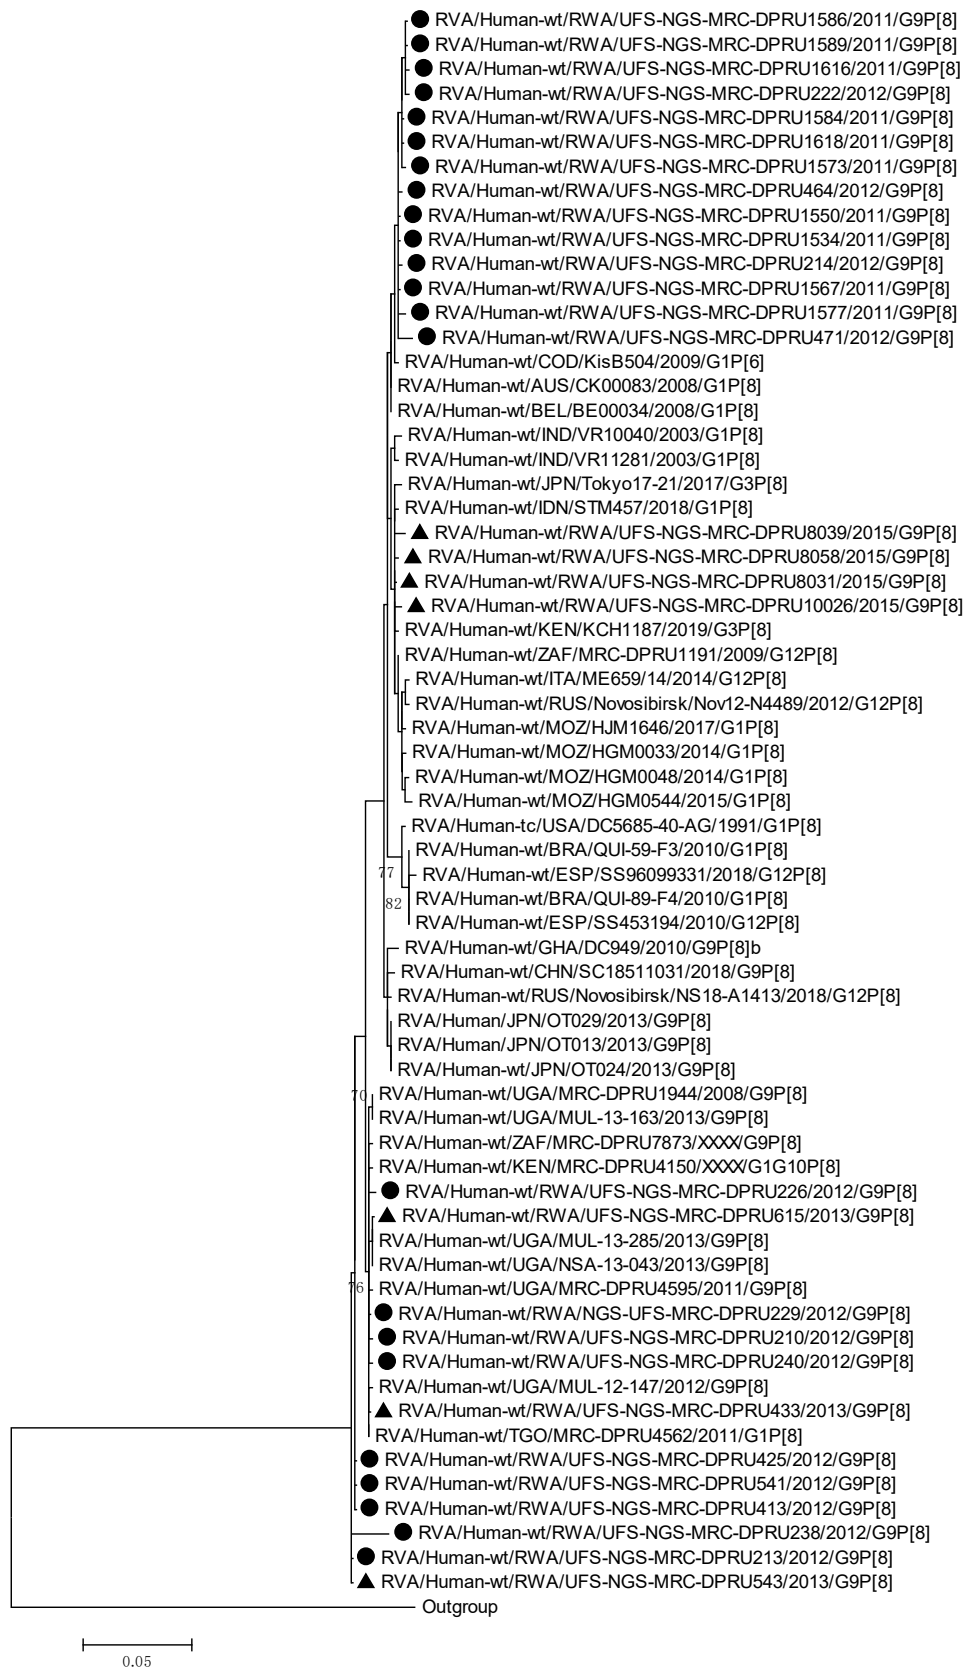

VP1

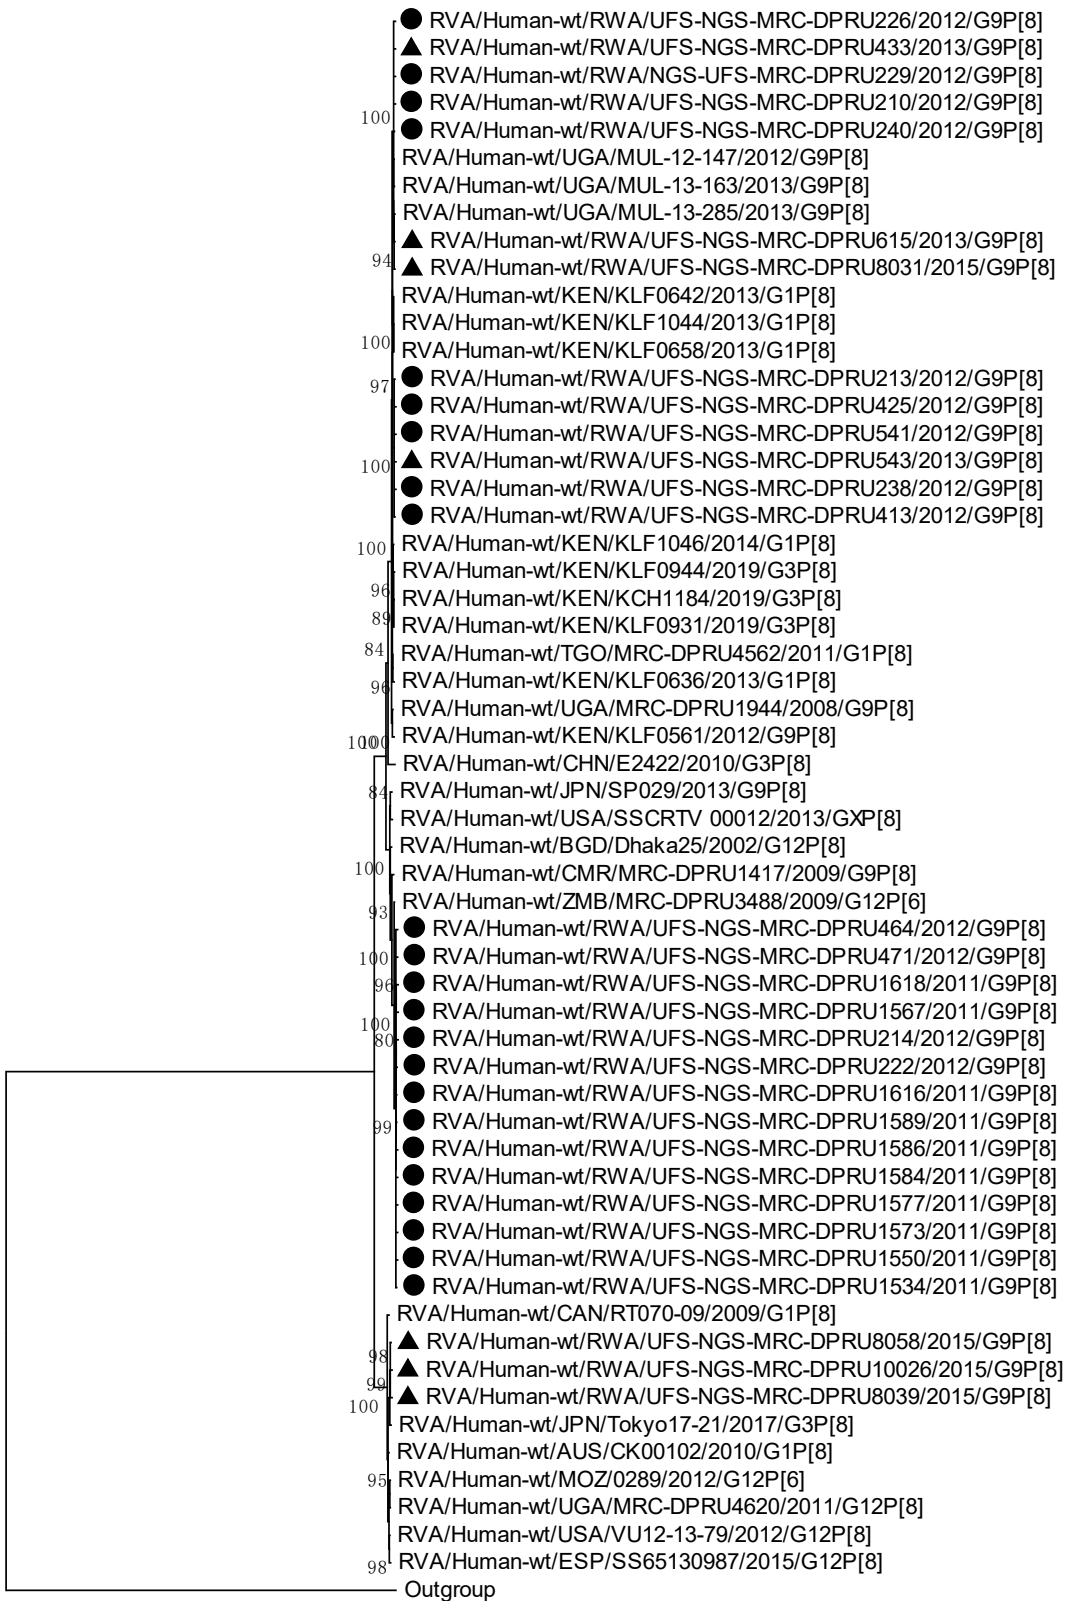

H  
0,01

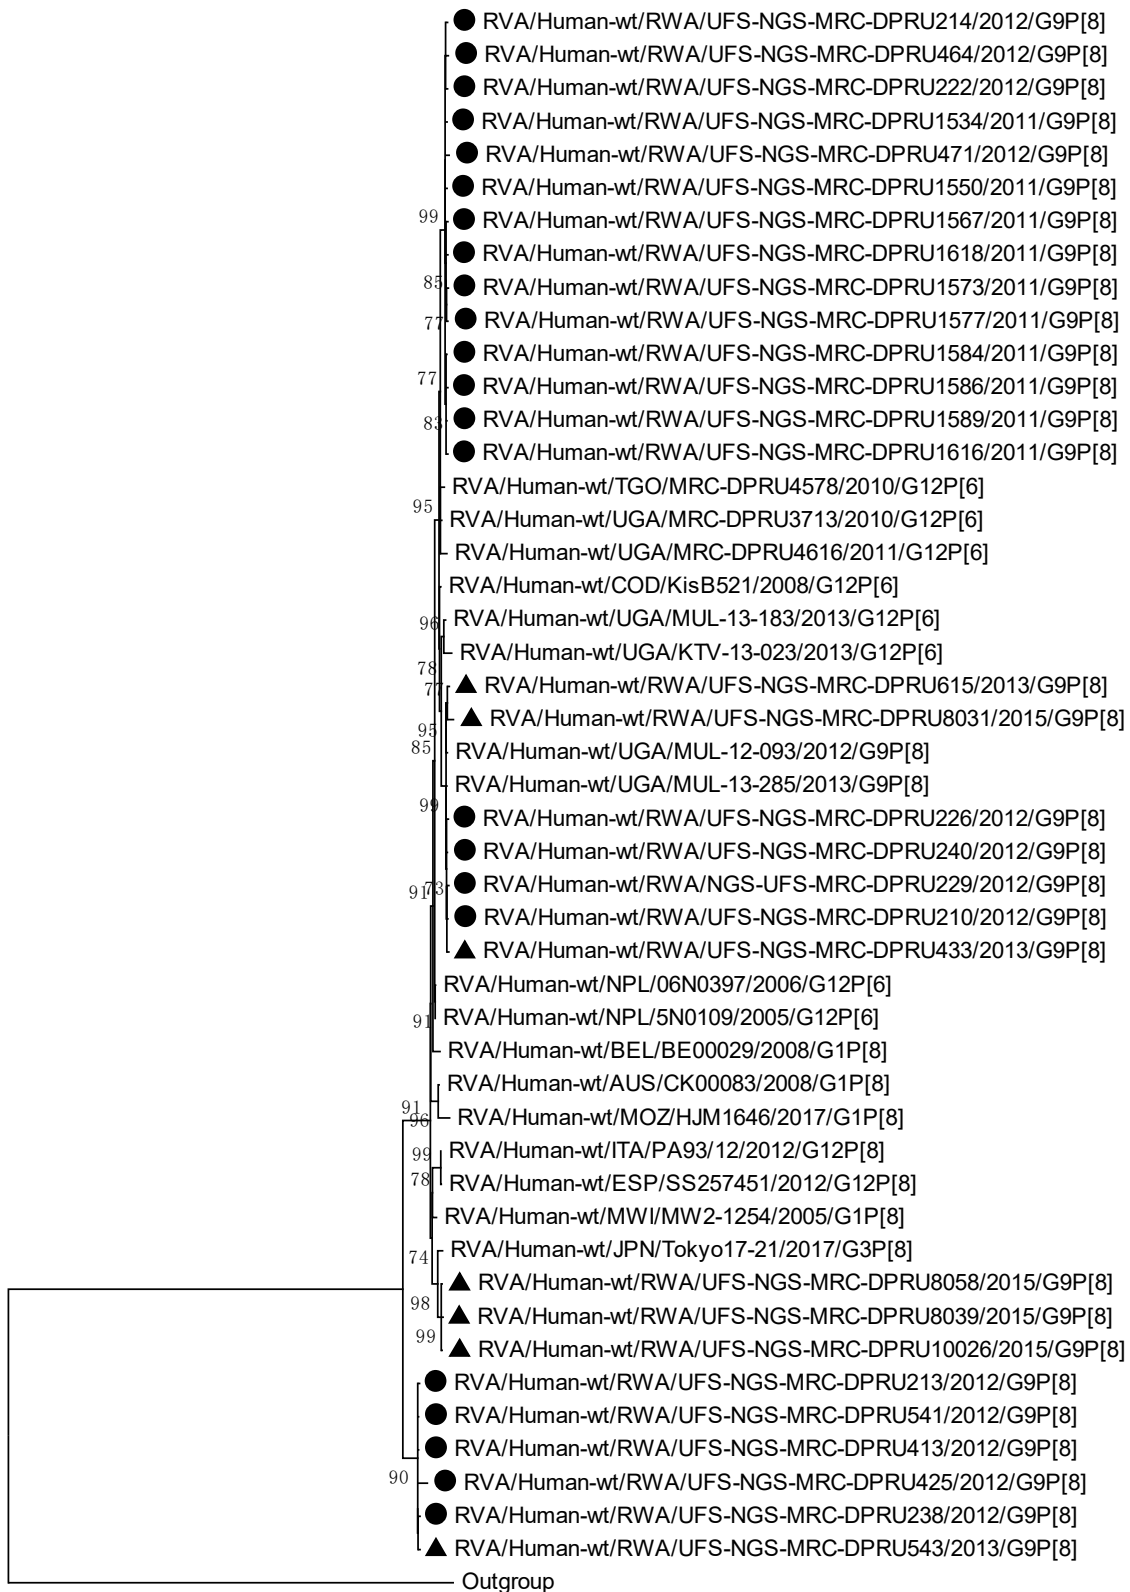

VP3

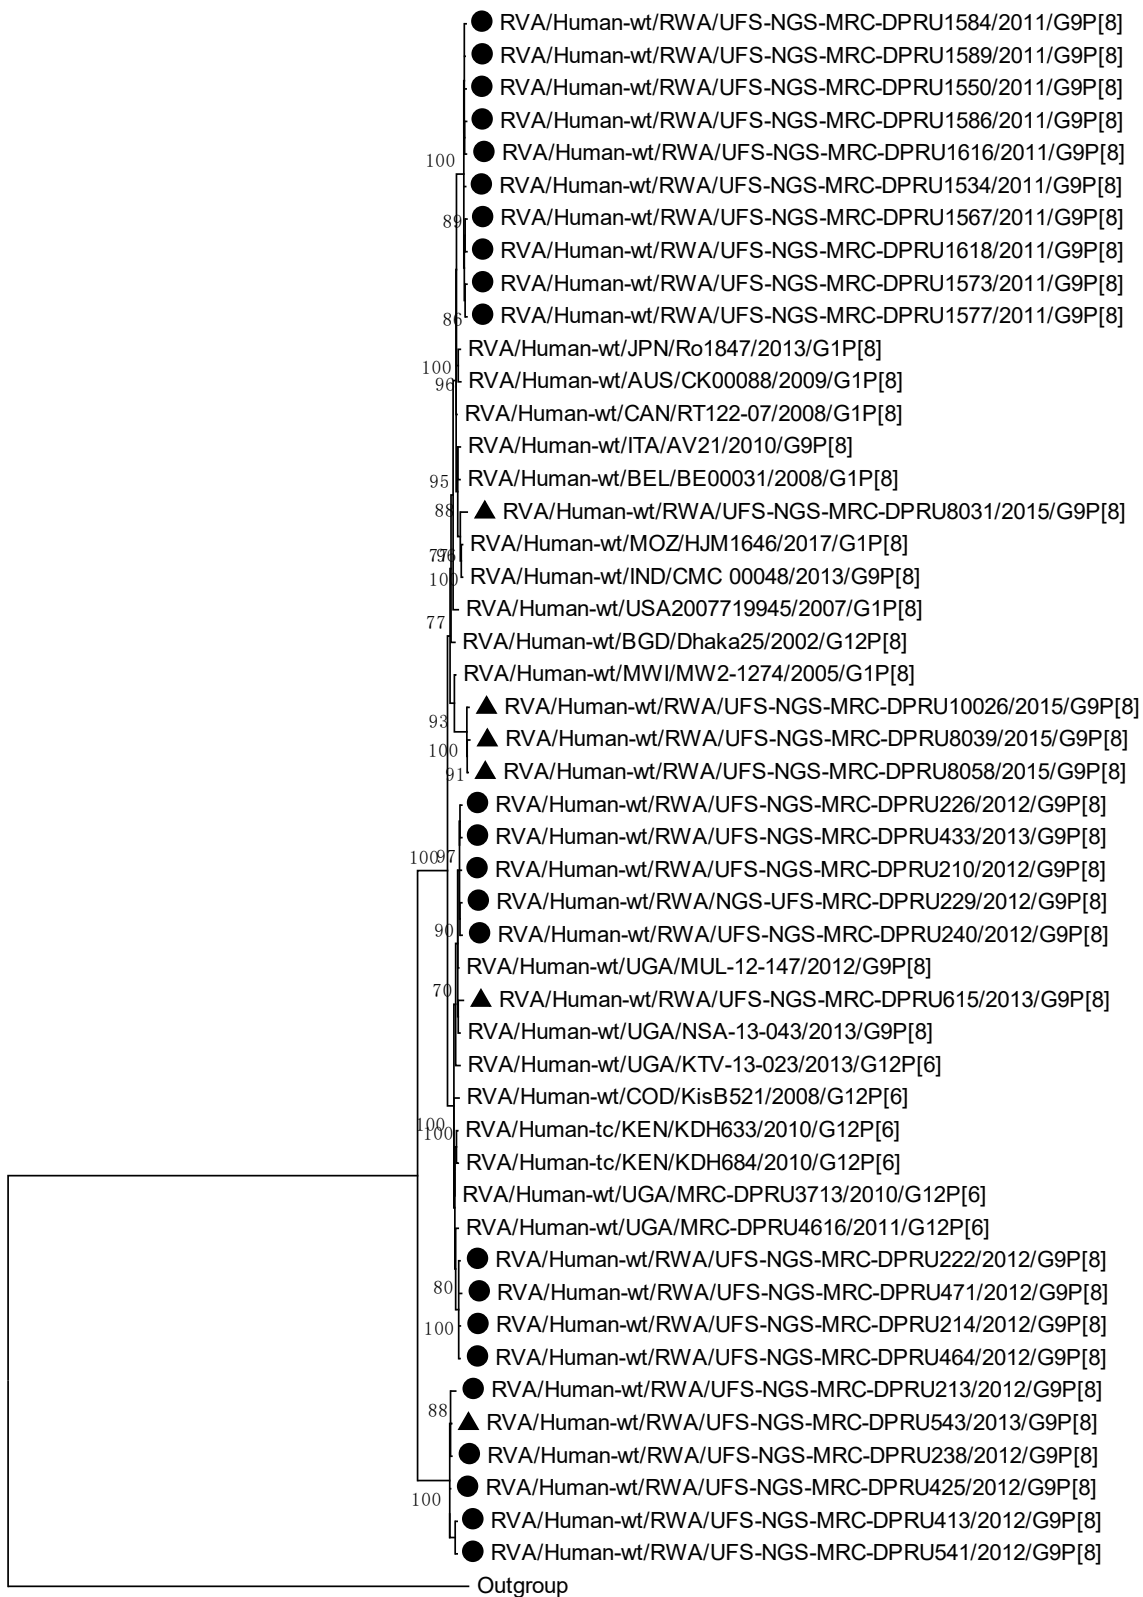



VP6

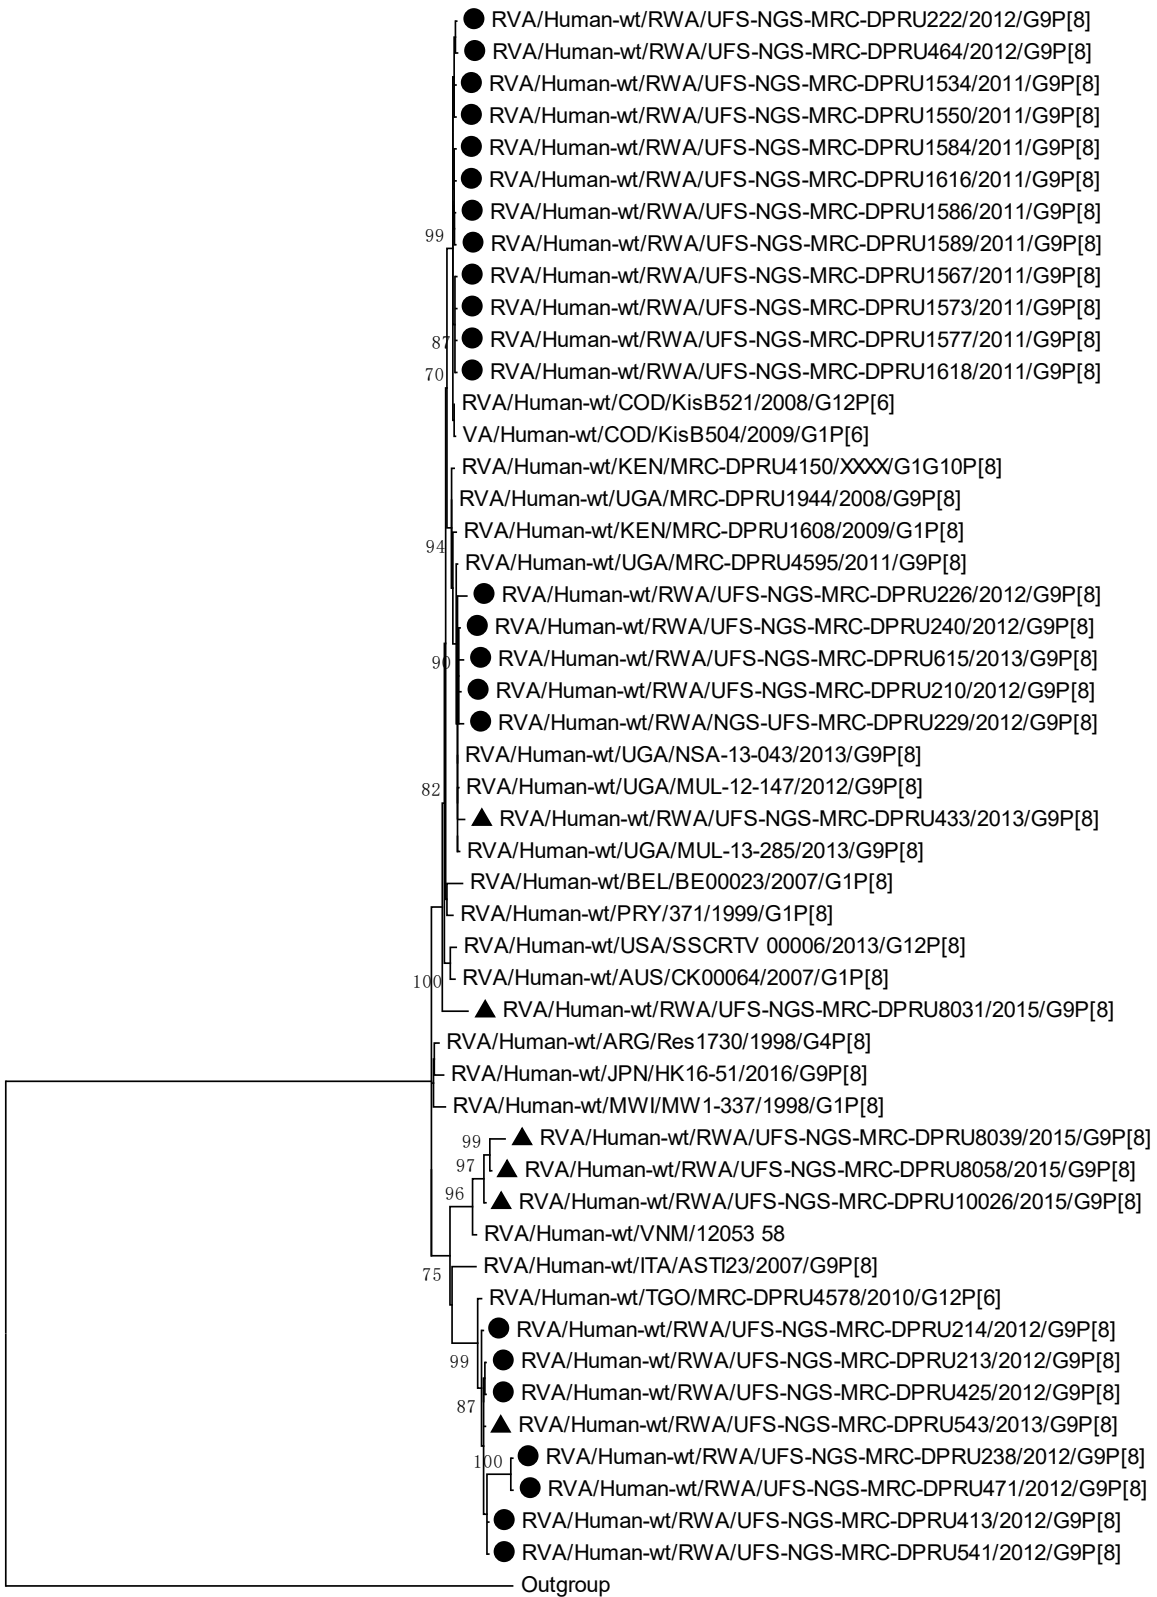

0,001
